# Supplementary material for: Deep learning-based diatom taxonomy on virtual slides
Source: PubMed Central journal article supplement (PMC7468105; doi:10.1038/s41598-020-71165-w), 2020-09-02
Supplement: 41598_2020_71165_MOESM1_ESM.pdf [file 41598_2020_71165_MOESM1_ESM.pdf]

# Deep learning-based diatom taxonomy on virtual slides

Michael Kloster<sup>1,2,\*</sup>, Daniel Langenkämper<sup>2</sup>, Martin Zurowietz<sup>2</sup>, Bánk Beszteri<sup>1</sup>, Tim W. Nattkemper<sup>2</sup>

<sup>1</sup>University of Duisburg-Essen, Faculty of Biology, Department of Phycology, Essen, Germany

<sup>2</sup>Bielefeld University, Faculty of Technology, Biodata Mining Group, Bielefeld, Germany

\*michael.kloster@uni-due.de

# Supplements

## I. Stitching artefacts

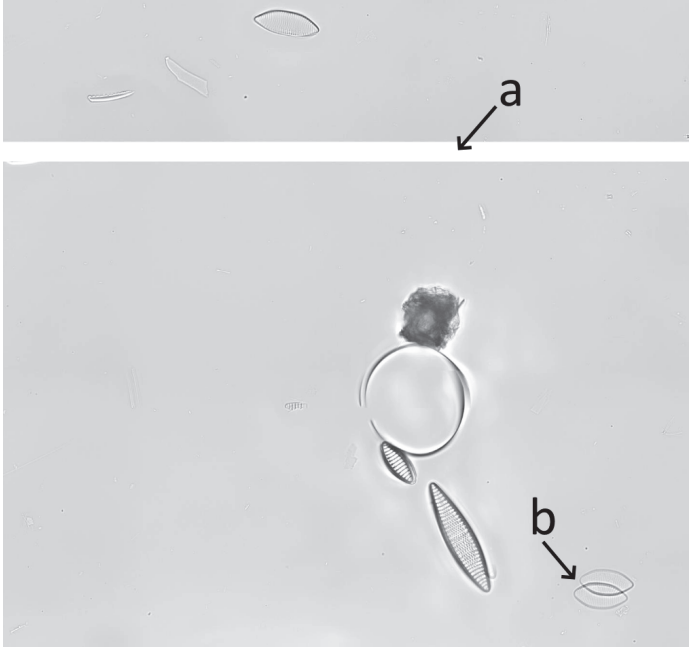

Figure S1: Typical stitching artefacts in virtual slides of PS103. a) missing scanning area, b) ghosting, i.e. doubling and shifting of objects

## II. BIIGLE Largo

The BIIGLE Largo feature facilitates quick and effective quality control of annotations by inspecting thumbnail images of all objects marked with a certain label. This way, the general (morphological) concept of a class becomes clear and erroneous assignments can be identified visually.

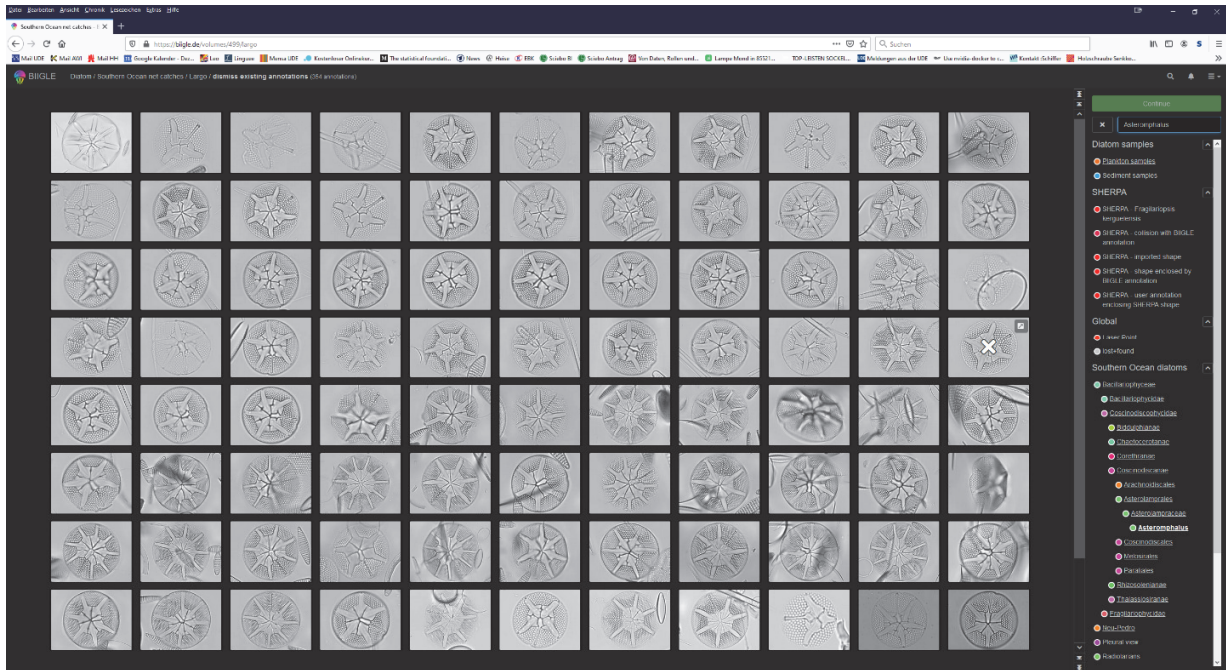

Figure S2: Screenshot of BIIGLE Largo. Thumbnails of objects marked with the same label are presented on the left side, the respective label is displayed on the right side.

## III. Downloading data and R scripts

The data used for our experiments can be inspected at <https://doi.pangaea.de/10.1594/PANGAEA.914544>. A ZIP archive comprising all data (cut-out images as well as CSV files containing class labels, cut-out image filenames and metadata for the different experiments) can be downloaded under the link “Annotated Southern Ocean diatom LM micrographs from PS79 & PS103 - download all” provided here.

A ZIP archive containing all data, our R scripts as well as F1 scores for all experiments be downloaded from [https://www.uni-due.de/imperia/md/content/phykologie/supplement\\_iii\\_data\\_r\\_scripts\\_and\\_results.zip](https://www.uni-due.de/imperia/md/content/phykologie/supplement_iii_data_r_scripts_and_results.zip).

## IV. Downloading detailed results for VGG16\_1FC

Training histories and R console output of the experiments with the best performing CNN architecture VGG16\_1FC can be downloaded from [https://www.uni-due.de/imperia/md/content/phykologie/supplement\\_iv\\_detailed\\_results\\_for\\_vgg16\\_1fc.zip](https://www.uni-due.de/imperia/md/content/phykologie/supplement_iv_detailed_results_for_vgg16_1fc.zip).

## V. Results for all investigated CNN architectures

Table S1: ANOVA of F1 scores for multiple models

|                           |                      | Data inter-<br>actions    |                      |                | CNN Architecture |                |                |                |                |                |                   |             |             |
|---------------------------|----------------------|---------------------------|----------------------|----------------|------------------|----------------|----------------|----------------|----------------|----------------|-------------------|-------------|-------------|
|                           |                      | Portion 10%               | Background unmasked  | Out-of-Set     | VGG16_1FC        | VGG16_2FC      | VGG19_1FC      | VGG19_2FC      | Xception       | DenseNet       | InceptionResNetV2 | MobileNetV2 | InceptionV3 |
|                           |                      | <b>F1<sub>micro</sub></b> | All ex-<br>periments |                |                  |                | 0.92***        | -0.01          | -0.01          | -0.02          | -0.09***          | -0.18***    | -0.19***    |
| x x x                     | <b>0.98***</b>       |                           | <b>0.98***</b>       | <b>0.98***</b> | <b>0.98***</b>   | <b>0.94***</b> | <b>0.88***</b> | <b>0.81***</b> | <b>0.80***</b> | <b>0.82***</b> |                   |             |             |
| ✓ x x                     | -0.06**              |                           | -0.08***             | -0.05**        | -0.07***         | -0.09***       | -0.05          | -0.07*         | -0.07**        | -0.07          |                   |             |             |
| x ✓ x                     | -0.02                |                           | -0.02                | -0.02          | -0.02            | -0.10***       | -0.06          | -0.05          | 0.00           | -0.01          |                   |             |             |
| x x ✓                     | -0.02                |                           | -0.03                | -0.05**        | -0.03            | -0.04          | -0.17**        | -0.05          | -0.11***       | -0.09*         |                   |             |             |
| ✓ ✓ x                     | 0.00                 |                           | 0.03                 | 0.00           | -0.03            | 0.01           | 0.00           | 0.01           | -0.04          | -0.06          |                   |             |             |
| ✓ x ✓                     | 0.01                 |                           | -0.01                | -0.01          | 0.01             | 0.04           | 0.04           | 0.03           | 0.02           | -0.03          |                   |             |             |
| x ✓ ✓                     | -0.02                |                           | 0.00                 | 0.02           | -0.01            | 0.00           | 0.05           | -0.03          | 0.00           | 0.00           |                   |             |             |
| ✓ ✓ ✓                     | -0.03                |                           | -0.04                | -0.04          | 0.03             | -0.03          | -0.09          | -0.02          | 0.00           | -0.02          |                   |             |             |
| <b>F1<sub>macro</sub></b> | All ex-<br>periments |                           |                      |                |                  | 0.89***        | -0.01          | -0.01          | -0.02          | -0.12***       | -0.19***          | -0.26***    | -0.31***    |
|                           | x x x                | <b>0.98***</b>            | <b>0.98***</b>       | <b>0.98***</b> | <b>0.97***</b>   | <b>0.92***</b> | <b>0.83***</b> | <b>0.71***</b> | <b>0.68***</b> | <b>0.69***</b> |                   |             |             |
|                           | ✓ x x                | -0.12***                  | -0.13***             | -0.09***       | -0.12***         | -0.15***       | -0.12**        | -0.11**        | -0.13***       | -0.13***       |                   |             |             |
|                           | x ✓ x                | -0.02                     | -0.02                | -0.02          | -0.02            | -0.15***       | -0.05          | -0.04          | 0.02           | 0.01           |                   |             |             |
|                           | x x ✓                | -0.03                     | -0.04                | -0.07**        | -0.04            | -0.04          | -0.13**        | -0.02          | -0.09**        | -0.05          |                   |             |             |
|                           | ✓ ✓ x                | 0.00                      | 0.03                 | -0.03          | -0.06            | 0.01           | 0.02           | 0.02           | -0.02          | -0.05          |                   |             |             |
|                           | ✓ x ✓                | 0.05                      | 0.03                 | 0.01           | 0.03             | 0.08*          | 0.11           | 0.08           | 0.03           | -0.01          |                   |             |             |
|                           | x ✓ ✓                | -0.02                     | 0.00                 | 0.03           | -0.01            | 0.01           | 0.05           | -0.02          | 0.04           | 0.00           |                   |             |             |
|                           | ✓ ✓ ✓                | -0.03                     | -0.05                | -0.01          | 0.04             | -0.02          | -0.13          | -0.07          | -0.03          | -0.02          |                   |             |             |

Rows "All experiments" give the average F1 score over all experiments as described in Fehler! Verweisquelle konnte nicht gefunden werden., the base level is defined by the VGG16\_1FC model, for other CNN architectures the values are relative to this. Base levels of the F1 scores without interactions (i.e. averages from experiments "A<sub>100,+</sub>|A<sub>100,+</sub>" and "B<sub>100,+</sub>|B<sub>100,+</sub>") are highlighted in bold font, results of the other experiments are given relative to these.
